# Supplementary material for: Community pharmacy-based SOAP notes documentation
Source: PubMed Central journal article supplement — Medicine (Baltimore). 2022 Jul 29;101(30):e29495. doi: 10.1097/MD.0000000000029495 (PMC9333531; doi:10.1097/md.0000000000029495), 2022-07-29
Supplement: medi-101-e29495-s001.pdf [file medi-101-e29495-s001.pdf]

**Supplemental Digital Content (Annex 324): Patient medication profile (Assessment and Plan-I) (Total number of medicines = 1082; average number of medicine consumed by the patients = 2.70)**

Formatiert: Schriftart: Fett

| SN | Medicines                                              | Therapeutic category                            | ATC Classification* | Frequency (%) |
|----|--------------------------------------------------------|-------------------------------------------------|---------------------|---------------|
| 1  | Acarbose tab. 50 mg                                    | Alpha-glucosidase inhibitors                    | A10BF01             | 8 (2)         |
| 2  | Aceclofenac SR tab. 200 mg                             | Preferential COX-2 Inhibitors                   | M01AB16             | 9 (2.3)       |
| 3  | Aceclofenac tab. 100 mg                                | Preferential COX-2 Inhibitors                   | M01AB16             | 36 (9)        |
| 4  | Albendazole syp.                                       | Anthelmintic drugs                              | P02CA03             | 2 (0.5)       |
| 5  | Albendazole tab. 400 mg                                | Anthelmintic drugs                              | P02CA03             | 8 (2)         |
| 6  | Alendronate tab.                                       | Second generation BPNs                          | M05BA04             | 1 (0.3)       |
| 7  | Amiodarone tab. 100 mg                                 | Antiarrhythmic drugs                            | C01BD01             | 2 (0.5)       |
| 8  | Amitriptyline tab. 10 mg                               | TCA                                             | N06AA09             | 7 (1.8)       |
| 9  | Amlodipine 2.5 mg + atenolol 25 mg tab.                | Dihydropyridine CCBs, Beta blockers             | C08CA01, C07AB03    | 1 (0.3)       |
| 10 | Amlodipine 5 mg + losartan 50 mg tab.                  | Dihydropyridine CCBs,                           | C09DB06             | 14 (3.5)      |
| 11 | Amlodipine 5 mg and atenolol 50 mg tab.                | Dihydropyridine CCBs, Beta blockers             | C08CA01, C07AB03    | 4 (1)         |
| 12 | Amlodipine tab. 2.5 mg                                 | Dihydropyridine CCBs                            | C08CA01             | 4 (1)         |
| 13 | Amlodipine tab. 5 mg                                   | Dihydropyridine CCBs                            | C08CA01             | 16 (4)        |
| 14 | Amoxicillin 500 mg and potassium clavunate 125 mg tab. | Aminopenicillins, Beta lactamase inhibitors     | J01CR02             | 7 (1.8)       |
| 15 | Amoxicillin and potassium clavulanate dry syp.         | Aminopenicillins, Beta lactamase inhibitors     | J01CR02             | 2 (0.5)       |
| 16 | Amoxicillin and potassium clavunate tab. 375 mg        | Aminopenicillins, Beta lactamase inhibitors     | J01CR02             | 1 (0.3)       |
| 17 | Amoxicillin cap. 250 mg                                | Aminopenicillins                                | J01CA04             | 1 (0.3)       |
| 18 | Amoxicillin dry syp.                                   | Aminopenicillins                                | J01CA04             | 4 (1)         |
| 19 | Amoxicillin tab. 500 mg                                | Aminopenicillins                                | J01CA04             | 16 (4)        |
| 20 | Antacid syp.                                           | Non-systemic antacids                           | A02A                | 14 (3.5)      |
| 21 | Antacid tab.                                           | Non-systemic antacids                           | A02A                | 1 (0.3)       |
| 22 | Aspirin tab. 150 mg                                    | Antiplatelet drugs                              | A01AD05             | 2 (0.5)       |
| 23 | Aspirin tab. 75 mg                                     | Antiplatelet drugs                              | A01AD05             | 11 (2.8)      |
| 24 | Atorvastatin tab. 10 mg                                | HMG-CoA reductase inhibitors (Statins)          | C10AA05             | 19 (4.8)      |
| 25 | Azithromycin tab. 1 g                                  | Macrolide antibiotics                           | J01FA10             | 5 (1.3)       |
| 26 | Azithromycin tab. 500 mg                               | Macrolide antibiotics                           | J01FA10             | 10 (2.5)      |
| 27 | Baclofen tab. 10 mg                                    | GABA mimetics                                   | M03BX01             | 2 (0.5)       |
| 28 | Benzocaine oint.                                       | Insoluble surface anesthetics                   | C05AD03             | 1 (0.3)       |
| 29 | Betamethasone eye drop                                 | Potent topical corticosteroids                  | A07EA04             | 2 (0.5)       |
| 30 | Bisacodyl tab. 10 mg                                   | Diphenylmethane purgatives                      | A06AB02             | 1 (0.3)       |
| 31 | Bisoprolol tab. 5 mg                                   | Beta blockers                                   | C07AB07             | 1 (0.3)       |
| 32 | Bromhexine + terbutaline syp.                          | Mucolytics, Bronchodllators                     | R05CB02, R03AC03    | 1 (0.3)       |
| 33 | Bromhexine syp. 10 mL                                  | Mucolytics                                      | R05CB02             | 2 (0.5)       |
| 34 | Budesonide 400 mcg + formoterol 6 mcg rotacap          | Potent topical corticosteroids, Bronchodllators | R03AK07             | 1 (0.3)       |
| 35 | Calamine, diphenhydramine lotion, zinc oxide lotion    | Metallic salts, Antihistamines                  | D04A                | 3 (0.8)       |
| 36 | Calcium tab. with vit. D3                              | Neutraceuticals                                 | A12AX               | 26 (6.5)      |
| 37 | Carbamazepine tab. 200 mg                              | Iminostilbene antiepileptic drugs               | N03AF01             | 2 (0.5)       |
| 38 | Carbamide peroxide ear drop 10%                        | Antinfectives                                   | D02AE               | 1 (0.3)       |
| 39 | Carboxymethylcellulose eye drop 0.5%                   | Lubricants                                      | S01XA20             | 15 (3.8)      |
| 40 | Cefixime syp.                                          | Third generation cephalosporins                 | J01DD08             | 2 (0.5)       |
| 41 | Cefixime tab. 200 mg                                   | Third generation cephalosporins                 | J01DD08             | 3 (0.8)       |
| 42 | Cefixime tab. 400 mg                                   | Third generation cephalosporins                 | J01DD08             | 4 (1)         |
| 43 | Cefpodoxime tab. 200 mg                                | Third generation cephalosporins                 | J01DD13             | 2 (0.5)       |
| 44 | Cetirizine syp.                                        | SGAs                                            | R06AE07             | 8 (2)         |
| 45 | Cetirizine tab. 10 mg                                  | SGAs                                            | R06AE07             | 4 (1)         |
| 46 | Chloramphenicol eye drop                               | Nitrobenzene derivatives                        | D06AX02             | 1 (0.3)       |
| 47 | Chlorhexidine mouth wash                               | Biguanide antiseptics                           | A01AB03             | 1 (0.3)       |
| 48 | Chlorpheniramine 2 mg + paracetamol 500 mg tab.        | Antihistaminics, Para aminophenol derivatives   | R06AB52             | 2 (0.5)       |

|     |                                                                           |                                                                    |                  |          |
|-----|---------------------------------------------------------------------------|--------------------------------------------------------------------|------------------|----------|
| 49  | Chlorzoxazone 250 mg + paracetamol 325 mg tab.                            | Centrally acting muscle relaxants,<br>Para aminophenol derivatives | M03BB53          | 13 (3.3) |
| 50  | Cholecalciferol cap. 60000 IU                                             | Neutraceuticals                                                    | A11CC05          | 24 (6)   |
| 51  | Cholecalciferol granules                                                  | Neutraceuticals                                                    | A11CC05          | 1 (0.3)  |
| 52  | Choline salicylate and benzalkonium chloride gel                          | Quaternary ammonium (Cationic)<br>antiseptics                      | N02BA03, R02AA10 | 1 (0.3)  |
| 53  | Ciprofloxacin eye drop                                                    | First generation FQs                                               | J01MA02          | 2 (0.5)  |
| 54  | Ciprofloxacin eye oint.                                                   | First generation FQs                                               | J01MA02          | 9 (2.3)  |
| 55  | Ciprofloxacin tab. 500 mg                                                 | First generation FQs                                               | J01MA02          | 3 (0.8)  |
| 56  | Clobetasone oint.                                                         | Very potent topical corticosteroids                                | D07AB01          | 1 (0.3)  |
| 57  | Clonazepam tab. 0.25 mg                                                   | BZDs                                                               | N03AE01          | 3 (0.8)  |
| 58  | Clonazepam tab. 0.5 mg                                                    | BZDs                                                               | N03AE01          | 1 (0.3)  |
| 59  | Clopidogrel tab. 75 mg                                                    | Antiplatelet drugs                                                 | B01AC04          | 2 (0.5)  |
| 60  | Clotrimazole oral paint                                                   | Azole derivatives                                                  | A01AB18          | 1 (0.3)  |
| 61  | Clotrimazole vaginal gel                                                  | Azole derivatives                                                  | A01AB18          | 4 (1)    |
| 62  | Cyproheptadine syp.                                                       | H1 Antagonists                                                     | R06AX02          | 2 (0.5)  |
| 63  | Dextromethorphan 15 mg+Chlorpheniramine 1 mg +<br>Phenylephrine 5 mg syp. | Nonopioid antitussives,<br>Antihistaminics                         | N07XX59          | 1 (0.3)  |
| 64  | Diacerein tab. 50 mg                                                      | Anthraquinones                                                     | M01AX21          | 1 (0.3)  |
| 65  | Diclofenac gel                                                            | Preferential COX-2<br>Inhibitors                                   | D11AX18          | 38 (9.5) |
| 66  | Dicycloverine syp.                                                        | Antilecretory-antispasmodic tertiary<br>amines                     | A03AA07          | 3 (0.8)  |
| 67  | Digestive enzymes syp.                                                    | Neutraceuticals                                                    | A09              | 1 (0.3)  |
| 68  | Dimethicone syp.                                                          | Methyl polysiloxane digestants                                     | NA               | 1 (0.3)  |
| 69  | Domperidone syp.                                                          | D2 receptor antagonists                                            | A03FA03          | 1 (0.3)  |
| 70  | Domperidone tab. 10 mg                                                    | D2 receptor antagonists                                            | A03FA03          | 13 (3.3) |
| 71  | Doxofylline tab. 400 mg                                                   | Theophylline derivatives                                           | R03DA11          | 3 (0.8)  |
| 72  | Doxycycline cap. 100 mg                                                   | Tetracyclines                                                      | A01AB22          | 2 (0.5)  |
| 73  | Ear wax softener                                                          | Antinfectives                                                      | NA               | 1 (0.3)  |
| 74  | Ebastine tab. 20 mg                                                       | SGAs                                                               | R06AX22          | 2 (0.5)  |
| 75  | Enalapril tab. 2.5 mg                                                     | ACE inhibitors                                                     | C09AA02          | 1 (0.3)  |
| 76  | Enalapril tab. 5 mg                                                       | ACE inhibitors                                                     | C09AA02          | 1 (0.3)  |
| 77  | Escitalopram tab. 10 mg                                                   | SSRIs                                                              | N06AB10          | 2 (0.5)  |
| 78  | Esomeprazole tab. 20 mg                                                   | Proton pump<br>inhibitors                                          | A02BC05          | 1 (0.3)  |
| 79  | Esomeprazole tab. 40 mg                                                   | Proton pump<br>inhibitors                                          | A02BC05          | 29 (7.2) |
| 80  | Etophylline and theophylline tab. 150 mg                                  | Methylxanthines                                                    | C04AD04, R03DA04 | 2 (0.5)  |
| 81  | Etoricoxib tab. 60 mg                                                     | Selective COX-2 inhibitors                                         | M01AH05          | 1 (0.3)  |
| 82  | Etoricoxib tab. 90 mg                                                     | Selective COX-2 inhibitors                                         | M01AH05          | 1 (0.3)  |
| 83  | Febuxostat tab. 40 mg                                                     | XOIs                                                               | M04AA03          | 7 (1.8)  |
| 84  | Fenofibrate tab. 160 mg                                                   | Lipoprotein lipase activators<br>(Fibrates)                        | C10AB05          | 5 (1.3)  |
| 85  | Ferrous ascorbate and folic acid tab.                                     | Mineral supplements                                                | B03AD            | 1 (0.3)  |
| 86  | Ferrous ascorbate cap.                                                    | Mineral supplements                                                | B03AA10          | 2 (0.5)  |
| 87  | Fexofenadine syp.                                                         | SGAs                                                               | R06AX26          | 6 (1.5)  |
| 88  | Fexofenadine tab. 120 mg                                                  | SGAs                                                               | R06AX26          | 3 (0.8)  |
| 89  | Fexofenadine tab. 180 mg                                                  | SGAs                                                               | R06AX26          | 7 (1.8)  |
| 90  | Finasteride tab. 5 mg                                                     | 5 a -reductase inhibitors                                          | D11AX10          | 1 (0.3)  |
| 91  | Flucloxacillin tab. 500 mg                                                | Penicillinase<br>resistant<br>penicillins                          | J01CF05          | 3 (0.8)  |
| 92  | Fluconazole cap. 150 mg                                                   | Triazole antifungals                                               | D01AC15          | 11 (2.8) |
| 93  | Flurbiprofen eye drop                                                     | Propionic acid<br>derivatives                                      | R02AX01          | 2 (0.5)  |
| 94  | Folic acid tab. 10 mg                                                     | Neutraceuticals                                                    | B03BB01          | 2 (0.5)  |
| 95  | Formoterol 6 mg and budesonide 400 mcg rotacap                            | Bronchodilators,                                                   | R03AK07          | 3 (0.8)  |
| 96  | Furosemide & amiloride tab.                                               | Loop diuretics,                                                    | C03EB01          | 2 (0.5)  |
| 97  | Furosemide tab. 40 mg                                                     | Loop diuretics                                                     | C03CA01          | 1 (0.3)  |
| 98  | Gabapentin tab. 100 mg                                                    | Cyclic GABA analogues                                              | N03AX12          | 4 (1)    |
| 99  | Gabapentin tab. 300 mg                                                    | Cyclic GABA analogues                                              | N03AX12          | 4 (1)    |
| 100 | Gliclazide tab. 40 mg                                                     | Sulfonylureas                                                      | A10BB09          | 1 (0.3)  |
| 101 | Gliclazide tab. 80 mg                                                     | Sulfonylureas                                                      | A10BB09          | 1 (0.3)  |
| 102 | Glimepiride tab. 1 mg                                                     | Sulfonylureas                                                      | A10BB12          | 2 (0.5)  |
| 103 | Glimepiride tab. 2 mg                                                     | Sulfonylureas                                                      | A10BB12          | 9 (2.3)  |
| 104 | Glimepiride tab. 3 mg                                                     | Sulfonylureas                                                      | A10BB12          | 5 (1.3)  |

|     |                                                                                    |                                       |                  |          |
|-----|------------------------------------------------------------------------------------|---------------------------------------|------------------|----------|
| 105 | Glipizide tab. 5 mg                                                                | Sulfonylureas                         | A10BB07          | 1 (0.3)  |
| 106 | Glucosamine tab. 500 mg                                                            | Amino sugar                           | M01AX05          | 2 (0.5)  |
| 107 | Guaifenesin syp.                                                                   | Secretion enhancer expectorants       | R05CA03          | 1 (0.3)  |
| 108 | Halobetasol cream                                                                  | Corticosteroids                       | NA               | 1 (0.3)  |
| 109 | Heath tonic syp.                                                                   | Digestants                            | A09              | 1 (0.3)  |
| 110 | Hydrochlorothiazide tab. 12.5 mg                                                   | Thiazides                             | C03AA03          | 2 (0.5)  |
| 111 | Hydrochlorothiazide tab. 25 mg                                                     | Thiazides                             | C03AA03          | 1 (0.3)  |
| 112 | Hydrocortisone oint.                                                               | Potent topical corticosteroids        | A01AC03          | 3 (0.8)  |
| 113 | Hyoscine tab. 10 mg                                                                | Semisynthetic anticholinergic drugs   | A04AD01          | 6 (1.5)  |
| 114 | Hyoscine tab. 20 mg                                                                | Semisynthetic anticholinergic drugs   | A04AD01          | 1 (0.3)  |
| 115 | Indometacin cap. 50 mg                                                             | Acetic acid derivatives               | C01EB03          | 3 (0.8)  |
| 116 | Indometacin tab. 75 mg                                                             | Acetic acid derivatives               | C01EB03          | 1 (0.3)  |
| 117 | Insulin inj.                                                                       | Antidiabetic peptide hormone          | A10AB01          | 2 (0.5)  |
| 118 | Isapgol (Psyllium) Husk                                                            | Bulk forming laxatives                | A06AC01          | 1 (0.3)  |
| 119 | Isosorbide dinitrate tab. 5 mg                                                     | Long-acting nitrates                  | C01DA08          | 1 (0.3)  |
| 120 | Isosorbide mononitrate tab. 10 mg                                                  | Long-acting nitrates                  | C01DA14          | 1 (0.3)  |
| 121 | Ketoconazole shampoo                                                               | Triazole antifungals                  | D01AC08          | 2 (0.5)  |
| 122 | Lactulose syp.                                                                     | Osmotic purgatives                    | A06AD11          | 2 (0.5)  |
| 123 | Levetiracetam tab. 500 mg                                                          | Antiepileptic drugs                   | N03AX14          | 1 (0.3)  |
| 124 | Levocetirizine tab. 5 mg                                                           | SGAs                                  | R06AE09          | 5 (1.3)  |
| 125 | Levofloxacin tab. 500 mg                                                           | Second generation FQs                 | J01MA12          | 1 (0.3)  |
| 126 | Lidocaine (2% w/w) + Chlorhexidine Gluconate (1% w/w) + Metronidazole (1% w/w) gel | Intermediate potency and duration LAs | N01BB52          | 2 (0.5)  |
| 127 | Lidocaine, Hydrocortisone acetate, Zinc Oxide and Allantoin oint.                  | Intermediate potency and duration LAs | N01BB52          | 1 (0.3)  |
| 128 | Linagliptin tab. 5 mg                                                              | DPP-4 inhibitors                      | A10BH05          | 1 (0.3)  |
| 129 | Liquid paraffin syp.                                                               | Stool softeners                       | A06AA01          | 1 (0.3)  |
| 130 | Liver tonic                                                                        | Digestants                            | A05              | 1 (0.3)  |
| 131 | Loperamide tab. 2 mg                                                               | Antidiarrheal opiate analogue         | A07DA03          | 2 (0.5)  |
| 132 | Losartan 50 mg + hydrochlorothiazide 12.5 mg tab.                                  | ARBs, thiazides                       | C09DA01          | 10 (2.5) |
| 133 | Losartan tab. 25 mg                                                                | ARBs                                  | C09CA01          | 5 (1.3)  |
| 134 | Losartan tab. 50 mg                                                                | ARBs                                  | C09CA01          | 10 (2.5) |
| 135 | Medicated toothpaste                                                               | Antiseptics                           | A01AA01          | 2 (0.5)  |
| 136 | Medroxyprogesterone tab. 10 mg                                                     | Progesterone derivatives              | G03AC06          | 2 (0.5)  |
| 137 | Mefenamic acid tab.                                                                | Fenamates                             | M01AG01          | 3 (0.8)  |
| 138 | Metformin 1 g + glimepiride 2 mg tab.                                              | Biguanide, sulfonylureas              | A10BA02, A10BB12 | 3 (0.8)  |
| 139 | Metformin 1 g and glimepiride 1 mg tab.                                            | Biguanide, sulfonylureas              | A10BA02, A10BB12 | 8 (2)    |
| 140 | Metformin tab. 1 g                                                                 | Biguanide                             | A10BA02          | 6 (1.5)  |
| 141 | Metformin tab. 1 g + sitagliptin 100 mg                                            | Biguanide,                            | A10BD07          | 1 (0.3)  |
| 142 | Metformin tab. 500 mg                                                              | Biguanide,                            | A10BA02          | 10 (2.5) |
| 143 | Metformin tab. 500 mg with glimepiride tab. 2 mg                                   | Biguanide, sulfonylureas              | A10BA02, A10BB12 | 2 (0.5)  |
| 144 | Metformin tab. 500 mg with glimepiride 1 mg                                        | Biguanide, sulfonylureas              | A10BA02, A10BB12 | 4 (1)    |
| 145 | Metformin tab. 850 mg                                                              | Biguanide                             | A10BA02          | 14 (3.5) |
| 146 | Metformin tab. 850 mg and glimepiride 1 g                                          | Biguanide, sulfonylureas              | A10BA02, A10BB12 | 1 (0.3)  |
| 147 | Methotrexate tab.                                                                  | DHFR inhibitors                       | L01BA01          | 1 (0.3)  |
| 148 | Methylcobalamin tab. 1500 mcg                                                      | Neutraceuticals                       | B03BA            | 17 (4.3) |
| 149 | Methylprednisolone tab. 4 mg                                                       | Potent topical corticosteroids        | D07AA01          | 3 (0.8)  |
| 150 | Metoprolol ER tab. 25 mg                                                           | Beta blockers                         | C07AB02          | 4 (1)    |
| 151 | Metoprolol ER tab. 50 mg                                                           | Beta blockers                         | C07AB02          | 2 (0.5)  |
| 152 | Metoprolol tab. 12.5 mg                                                            | Beta blockers                         | C07AB02          | 1 (0.3)  |
| 153 | Metronidazole syp.                                                                 | Nitroimidazoles                       | A01AB17          | 2 (0.5)  |
| 154 | Metronidazole tab. 200 mg                                                          | Nitroimidazoles                       | A01AB17          | 1 (0.3)  |
| 155 | Metronidazole tab. 400 mg                                                          | Nitroimidazoles                       | A01AB17          | 15 (3.8) |
| 156 | Metronidazole, clotrimazole and lactic acid vaginal tab.                           | Nitroimidazoles                       | P01AB51          | 2 (0.5)  |
| 157 | Mometasone nasal spray                                                             | Potent topical corticosteroids        | D07AC13          | 1 (0.3)  |
| 158 | Montelukast tab. 10 mg                                                             | Leukotriene antagonists               | R03DC03          | 1 (0.3)  |
| 159 | Mupirocin oint. 2%                                                                 | Antibacterial                         | D06AX09          | 6 (1.5)  |
| 160 | Naproxen tab. 500 mg                                                               | Propionic acid derivatives            | G02CC02          | 2 (0.5)  |
| 161 | Neomycin eye drop                                                                  | Aminoglycosides                       | A01AB08          | 1 (0.3)  |
| 162 | Nimesulide tab. 100 mg                                                             | Preferential COX-2 Inhibitors         | M01AX17          | 15 (3.8) |
| 163 | Norgestrel and ethinyloestradiol tab.                                              | Sex hormone preparations              | G03AA06          | 2 (0.5)  |
| 164 | Omeprazole cap. 40 mg                                                              | Proton pump                           | A02BC01          | 1 (0.3)  |

|     |                                                     |                                                          |         |           |
|-----|-----------------------------------------------------|----------------------------------------------------------|---------|-----------|
|     |                                                     | inhibitors                                               |         |           |
| 165 | Ondansetron tab. 4 mg                               | Selective 5-HT3 blockers                                 | A04AA01 | 1 (0.3)   |
| 166 | Ornidazole tab. 500 mg                              | Nitroimidazoles                                          | G01AF06 | 4 (1)     |
| 167 | Oral Rehydration Solution (ORS)                     | Electrolytes                                             | A07CA   | 3 (0.8)   |
| 168 | Oxymetazoline nasal drop                            | Nasal decongestants                                      | R01AA05 | 1 (0.3)   |
| 169 | Pantoprazole tab. 40 mg                             | Proton pump inhibitors                                   | A02BC02 | 77 (19.3) |
| 170 | Paracetamol + ibuprofen syp.                        | Para aminophenol derivatives, Propionic acid derivatives | N02BE51 | 2 (0.5)   |
| 171 | Paracetamol 500 mg + caffeine 25 mg                 | Para aminophenol derivatives,                            | N02BE71 | 2 (0.5)   |
| 172 | Paracetamol 500 mg and codeine 10 mg tab.           | Para aminophenol derivatives, Opioids                    | N02AJ06 | 3 (0.8)   |
| 173 | Paracetamol 500 mg and ibuprofen 400 mg tab.        | Para aminophenol derivatives, Propionic acid derivatives | N02BE51 | 15 (3.8)  |
| 174 | Paracetamol syp.                                    | Para aminophenol derivatives                             | N02BE01 | 19 (4.8)  |
| 175 | Paracetamol tab. 250 mg                             | Para aminophenol derivatives                             | N02BE01 | 1 (0.3)   |
| 176 | Paracetamol tab. 500 mg                             | Para aminophenol derivatives                             | N02BE01 | 9 (2.3)   |
| 177 | Perampanel tab. 10 mg                               | Antiseizure drugs                                        | N03AX22 | 1 (0.3)   |
| 178 | Permethrin lotion                                   | Potent pyrethroid insecticides                           | P03AC04 | 1 (0.3)   |
| 179 | Phenobarbital tab. 60 mg                            | Barbiturates                                             | N03AA02 | 1 (0.3)   |
| 180 | Phenytoin tab. 100 mg                               | Hydantoin                                                | N03AB02 | 1 (0.3)   |
| 181 | Potassium citrate syp.                              | Electrolytes                                             | A12BA02 | 1 (0.3)   |
| 182 | Povidone iodine gargle                              | Halogen antiseptics                                      | R02AA15 | 6 (1.5)   |
| 183 | Povidone iodine solution                            | Halogen antiseptics                                      | D08AG02 | 1 (0.3)   |
| 184 | Prazosin tab. 2.5 mg                                | Alpha blockers                                           | C02CA01 | 1 (0.3)   |
| 185 | Prednisolone tab. 30/20/10 mg                       | Intermediate acting corticosteroids                      | A07EA01 | 1 (0.3)   |
| 186 | Pregabalin cap. 75 mg                               | Cyclic GABA analogues                                    | N03AX16 | 7 (1.8)   |
| 187 | Pregabalin tab. 50 mg                               | Cyclic GABA analogues                                    | N03AX16 | 2 (0.5)   |
| 188 | Probiotic cap.                                      | Neutraceuticals                                          | A07FA51 | 5 (1.3)   |
| 189 | Probiotic syp.                                      | Neutraceuticals                                          | A07FA51 | 1 (0.3)   |
| 190 | Prochlorperazine tab. 5 mg                          | Neuroleptics (D2 blockers)                               | N05AB04 | 1 (0.3)   |
| 191 | Propranolol tab. 10 mg                              | Beta blockers                                            | C07AA05 | 2 (0.5)   |
| 192 | Protein powder                                      | Neutraceuticals                                          | V06B    | 3 (0.8)   |
| 193 | Rabeprazole tab. 20 mg                              | Proton pump inhibitors                                   | A02BC04 | 28 (7)    |
| 194 | Rabeprazole tab. 40 mg                              | Proton pump inhibitors                                   | A02BC04 | 1 (0.3)   |
| 195 | Ramipril tab. 5 mg                                  | Long-acting ACE inhibitors                               | C09AA05 | 1 (0.3)   |
| 196 | Ranitidine tab. 150 mg                              | H2 Antihistamines                                        | A02BA02 | 5 (1.3)   |
| 197 | Rosuvastatin tab. 10 mg                             | Statins                                                  | C10AA07 | 7 (1.8)   |
| 198 | Rupatadine tab. 10 mg                               | Antihistaminics                                          | R06AX28 | 1 (0.3)   |
| 199 | Salbutamol rotacap 200 mcg                          | Bronchodilators                                          | R03AC02 | 2 (0.5)   |
| 200 | Salbutamol syp. 2 mg                                | Bronchodilators                                          | R03AC02 | 1 (0.3)   |
| 201 | Salicylic acid 20% oint.                            | Keratolytics                                             | D02AF   | 1 (0.3)   |
| 202 | Salmeterol 50 mcg and fluticasone 250 mg rotacap    | Bronchodilators,                                         | R03AK06 | 6 (1.5)   |
| 203 | Secnidazole tab. 2 g                                | Nitroimidazoles                                          | P01AB07 | 3 (0.8)   |
| 204 | Sitagliptin 50 mg + metformin 850 mg tab.           | DPP-4 inhibitors, Biguanide                              | A10BD07 | 2 (0.5)   |
| 205 | Sitagliptin 50 mg + Metformin 500 mg tab.           | DPP-4 inhibitors, Biguanide                              | A10BD07 | 1 (0.3)   |
| 206 | Sitagliptin 50 mg and metformin 1 g tab.            | DPP-4 inhibitors, Biguanide                              | A10BD07 | 9 (2.3)   |
| 207 | Sitagliptin tab. 50 mg                              | DPP-4 inhibitors                                         | A10BH01 | 1 (0.3)   |
| 208 | Sodium cromoglicate eye drop 2%                     | Mast cell stabilizers                                    | R03AK04 | 1 (0.3)   |
| 209 | Sodium valproate 333 mg + valproic acid 145 mg tab. | Aliphatic carboxylic acid                                | N03AG01 | 2 (0.5)   |
| 210 | Sodium valproate tab. 750 mg                        | Aliphatic carboxylic acid                                | N03AG01 | 1 (0.3)   |
| 211 | Tamsulosin cap. 0.4 mg                              | α, Selective blockers                                    | G04CA02 | 4 (1)     |
| 212 | Telmisartan 40 mg and hydrochlorothiazide 12.5 mg   | ARBs, thiazides                                          | C09DA07 | 1 (0.3)   |
| 213 | Telmisartan tab. 20 mg                              | ARBs                                                     | C09CA07 | 2 (0.5)   |
| 214 | Telmisartan tab. 40 mg                              | ARBs                                                     | C09CA07 | 5 (1.3)   |
| 215 | Telmisartan tab. 80 mg                              | ARBs                                                     | C09CA07 | 2 (0.5)   |
| 216 | Thiamine (vit B1) tab.                              | Neutraceuticals                                          | A11DA01 | 1 (0.3)   |

|     |                                            |                                                 |         |          |
|-----|--------------------------------------------|-------------------------------------------------|---------|----------|
| 217 | Thyroxine tab. 100 mg                      | Thyroid hormone preparations                    | H03AA01 | 1 (0.3)  |
| 218 | Thyroxine tab. 25 mcg                      | Thyroid hormone preparations                    | H03AA01 | 5 (1.3)  |
| 219 | Thyroxine tab. 37.5 mg                     | Thyroid hormone preparations                    | H03AA01 | 1 (0.3)  |
| 220 | Thyroxine tab. 50 mcg                      | Thyroid hormone preparations                    | H03AA01 | 7 (1.8)  |
| 221 | Thyroxine tab. 75 mg                       | Thyroid hormone preparations                    | H03AA01 | 3 (0.8)  |
| 222 | Tinidazole tab. 1 g                        | Nitroimidazoles                                 | J01XD02 | 3 (0.8)  |
| 223 | Tinidazole tab. 2 g                        | Nitroimidazoles                                 | J01XD02 | 4 (1)    |
| 224 | Tiotropium rotacap 18 mcg                  | Semisynthetic anticholinergic drugs             | R03BB04 | 7 (1.8)  |
| 225 | Tizanidine tab. 2 mg                       | Central $\alpha_2$ agonists                     | M03BX02 | 3 (0.8)  |
| 226 | Topiramate tab. 40 mg                      | Antiepileptic drugs                             | N03AX11 | 1 (0.3)  |
| 227 | Tramadol 37.5 mg and paracetamol 325 mg OD | Synthetic opioids, Para aminophenol derivatives | N02AJ13 | 1 (0.3)  |
| 228 | Tranexamic acid tab. 500 mg                | Antifibrinolytic drugs                          | B02AA02 | 2 (0.5)  |
| 229 | Triamcinolone gel                          | Potent topical corticosteroids                  | A01AC01 | 1 (0.3)  |
| 230 | Valacyclovir tab. 1 g                      | Antiviral drugs                                 | J05     | 1 (0.3)  |
| 231 | Vitamin B complex cap. with vitamin C      | Neutraceuticals                                 | A11EB   | 17 (4.3) |
| 232 | Vitamin B complex syp.                     | Neutraceuticals                                 | A11E    | 6 (1.5)  |
| 233 | Tocopherol cap. 400 mg                     | Antioxidants                                    | A11HA03 | 2 (0.5)  |
| 234 | Voglibose tab. 0.3 mg                      | Alpha-glucosidase inhibitors                    | A10BF03 | 6 (1.5)  |
| 235 | Warfarin tab. 1 mg                         | Coumarin anticoagulants                         | B01AA03 | 1 (0.3)  |
| 236 | Warfarin tab. 5 mg                         | Coumarin anticoagulants                         | B01AA03 | 1 (0.3)  |

\*35 WHO Guidelines for ATC classification and DDD assignment 2020

Formatiert: Hochgestellt

**Supplemental Digital Content (Annex 243): Therapeutic category-wise medication use**

Formatiert: Schriftart: Fett

| SN    | Therapeutic category                            | Medicines                                              | Frequency (%) |
|-------|-------------------------------------------------|--------------------------------------------------------|---------------|
| 1     | Alpha-glucosidase inhibitors                    | Acarbose tab. 50 mg                                    | 8 (2)         |
|       |                                                 | Voglibose tab. 0.3 mg                                  | 6 (1.5)       |
|       |                                                 | Total                                                  | 14 (3.5)      |
| 2     | Preferential COX-2 inhibitors                   | Aceclofenac SR tab. 200 mg                             | 9 (2.3)       |
|       |                                                 | Aceclofenac tab. 100 mg                                | 36 (9)        |
|       |                                                 | Diclofenac gel                                         | 38 (9.5)      |
|       |                                                 | Total                                                  | 83 (20.8)     |
| 3     | Anthelmintics                                   | Albendazole syp.                                       | 2 (0.5)       |
|       |                                                 | Albendazole tab. 400 mg                                | 8 (2)         |
|       |                                                 | Total                                                  | 10 (2.5)      |
| 4     | Second generation BPNs                          | Atelronate tab.                                        | 1 (0.3)       |
| 5     | Antiarrhythmics                                 | Amiodarone tab. 100 mg                                 | 2 (0.5)       |
| 6     | TCAs                                            | Amitriptyline tab. 10 mg                               | 7 (1.8)       |
| 7     | Dihydropyridine CCBs, Beta blockers             | Amlodipine 2.5 mg + atenolol 25 mg tab.                | 1 (0.3)       |
|       |                                                 | Amlodipine 5 mg and atenolol 50 mg tab.                | 4 (1)         |
|       |                                                 | Total                                                  | 5 (1.3)       |
| 8     | Dihydropyridine CCBs, ARBs                      | Amlodipine 5 mg + losartan 50 mg tab.                  | 14 (3.5)      |
| 9     | Dihydropyridine CCBs                            | Amlodipine tab. 2.5 mg                                 | 4 (1)         |
|       |                                                 | Amlodipine tab. 5 mg                                   | 16 (4)        |
|       |                                                 | Total                                                  | 20 (5)        |
| 10    | Aminopenicillins, Beta lactamase inhibitors     | Amoxicillin 500 mg and potassium clavunate 125 mg tab. | 7 (1.8)       |
|       |                                                 | Amoxicillin and potassium clavulanate dry syp.         | 2 (0.5)       |
|       |                                                 | Amoxicillin and potassium clavunate tab. 375 mg        | 1 (0.3)       |
|       |                                                 | Total                                                  | 10 (2.6)      |
| 11    | Aminopenicillins                                | Amoxicillin cap. 250 mg                                | 1 (0.3)       |
|       |                                                 | Amoxicillin dry syp.                                   | 4 (1)         |
|       |                                                 | Amoxicillin tab. 500 mg                                | 16 (4)        |
|       |                                                 | Total                                                  | 21 (5.3)      |
| 12    | Non-systemic antacids                           | Antacid syp.                                           | 14 (3.5)      |
|       |                                                 | Antacid tab.                                           | 1 (0.3)       |
|       |                                                 | Total                                                  | 15 (3.8)      |
| 13    | Antiplatelets                                   | Aspirin tab. 150 mg                                    | 2 (0.5)       |
|       |                                                 | Aspirin tab. 75 mg                                     | 11 (2.8)      |
|       |                                                 | Clopidogrel tab. 75 mg                                 | 2 (0.5)       |
|       |                                                 | Total                                                  | 15 (3.8)      |
| 14    | HMG-CoA reductase inhibitors (Statins)          | Atorvastatin tab. 10 mg                                | 19 (4.8)      |
|       |                                                 | Rosuvastatin tab. 10 mg                                | 7 (1.8)       |
|       |                                                 | Total                                                  | 26 (6.6)      |
| 15    | Macrolide antibiotics                           | Azithromycin tab. 1 g                                  | 5 (1.3)       |
|       |                                                 | Azithromycin tab. 500 mg                               | 10 (2.5)      |
|       |                                                 | Total                                                  | 15 (3.8)      |
| 16    | GABA mimetics                                   | Baclofen tab. 10 mg                                    | 2 (0.5)       |
| 17    | Insoluble surface anesthetics                   | Benzocaine oint.                                       | 1 (0.3)       |
| 18    | Potent topical corticosteroids                  | Betamethasone eye drop                                 | 2 (0.5)       |
|       |                                                 | Hydrocortisone oint.                                   | 3 (0.8)       |
|       |                                                 | Methylprednisolone tab. 4 mg                           | 3 (0.8)       |
|       |                                                 | Mometasone nasal spray                                 | 1 (0.3)       |
|       |                                                 | Triamcinolone gel                                      | 1 (0.3)       |
| Total | 10 (2.7)                                        |                                                        |               |
| 19    | Potent topical corticosteroids, Bronchodllators | Budesonide 400 mcg + formoterol 6 mcg rotacap          | 1 (0.3)       |
| 20    | Very potent topical corticosteroids             | Clobetasone oint.                                      | 1 (0.3)       |
| 21    | Diphenylmethane purgatives                      | Bisacodyl tab. 10 mg                                   | 1 (0.3)       |
| 22    | Beta blockers                                   | Bisoprolol tab. 5 mg                                   | 1 (0.3)       |
|       |                                                 | Metoprolol ER tab. 25 mg                               | 4 (1)         |
|       |                                                 | Metoprolol ER tab. 50 mg                               | 2 (0.5)       |
|       |                                                 | Metoprolol tab. 12.5 mg                                | 1 (0.3)       |
|       |                                                 | Propranolol tab. 10 mg                                 | 2 (0.5)       |
| Total | 10 (2.6)                                        |                                                        |               |
| 23    | Mucolytics, Bronchodllators                     | Bromhexine + terbutaline syp.                          | 1 (0.3)       |
| 24    | Mucolytics                                      | Bromhexine syp. 10 mL                                  | 2 (0.5)       |
| 25    | Metallic salts, Antihistamines                  | Calamine, diphenhydramine lotion, zinc oxide lotion    | 3 (0.8)       |
| 26    | Neutraceuticals                                 | Calcium tab. with vit. D3                              | 26 (6.5)      |
|       |                                                 | Cholecalciferol cap. 60000 IU                          | 24 (6)        |
|       |                                                 | Cholecalciferol granules                               | 1 (0.3)       |
|       |                                                 | Digestive enzymes syp.                                 | 1 (0.3)       |

|    |                                                                 |                                                                        |            |
|----|-----------------------------------------------------------------|------------------------------------------------------------------------|------------|
|    |                                                                 | Folic acid tab. 10 mg                                                  | 2 (0.5)    |
|    |                                                                 | Methylcobalamin tab. 1500 mcg                                          | 17 (4.3)   |
|    |                                                                 | Probiotic cap.                                                         | 5 (1.3)    |
|    |                                                                 | Probiotic syp.                                                         | 1 (0.3)    |
|    |                                                                 | Vitamin B complex cap. with vitamin C                                  | 17 (4.3)   |
|    |                                                                 | Vitamin B complex syp.                                                 | 6 (1.5)    |
|    |                                                                 | Protein powder                                                         | 3 (0.8)    |
|    |                                                                 | Thiamine (vit B1) tab.                                                 | 1 (0.3)    |
|    | Antioxidants                                                    | Tocopherol cap. 400 mg                                                 | 2 (0.5)    |
|    | Total                                                           |                                                                        | 106 (26.9) |
| 27 | Antiepileptics                                                  | Carbamazepine tab. 200 mg                                              | 2 (0.5)    |
|    |                                                                 | Topiramate tab. 40 mg                                                  | 1 (0.3)    |
|    |                                                                 | Levetiracetam tab. 500 mg                                              | 1 (0.3)    |
|    |                                                                 | Perampanel tab. 10 mg                                                  | 1 (0.3)    |
|    | Hydantoins                                                      | Phenytoin tab. 100 mg                                                  | 1 (0.3)    |
|    | Aliphatic carboxylic acids                                      | Sodium valproate 333 mg + valproic acid 145 mg tab.                    | 2 (0.5)    |
|    |                                                                 | Sodium valproate tab. 750 mg                                           | 1 (0.3)    |
|    | Total                                                           |                                                                        | 9 (2.5)    |
| 28 | Lubricants                                                      | Carbamide peroxide ear drop 10%                                        | 1 (0.3)    |
|    |                                                                 | Carboxymethylcellulose eye drop 0.5%                                   | 15 (3.8)   |
|    |                                                                 | Ear wax softener                                                       | 1 (0.3)    |
|    | Total                                                           |                                                                        | 17 (4.4)   |
| 29 | Third generation cephalosporins                                 | Cefixime syp.                                                          | 2 (0.5)    |
|    |                                                                 | Cefixime tab. 200 mg                                                   | 3 (0.8)    |
|    |                                                                 | Cefixime tab. 400 mg                                                   | 4 (1)      |
|    |                                                                 | Cefpodoxime tab. 200 mg                                                | 2 (0.5)    |
|    | Total                                                           |                                                                        | 11 (2.8)   |
| 30 | SGAs                                                            | Cetirizine syp.                                                        | 8 (2)      |
|    |                                                                 | Cetirizine tab. 10 mg                                                  | 4 (1)      |
|    |                                                                 | Ebastine tab. 20 mg                                                    | 2 (0.5)    |
|    |                                                                 | Fexofenadine syp.                                                      | 6 (1.5)    |
|    |                                                                 | Fexofenadine tab. 120 mg                                               | 3 (0.8)    |
|    |                                                                 | Fexofenadine tab. 180 mg                                               | 7 (1.8)    |
|    |                                                                 | Levocetirizine tab. 5 mg                                               | 5 (1.3)    |
|    | Total                                                           |                                                                        | 30 (8.9)   |
| 31 | Nitrobenzene derivatives                                        | Chloramphenicol eye drop                                               | 1 (0.3)    |
| 32 | Antiseptics                                                     | Chlorhexidine mouth wash                                               | 1 (0.3)    |
|    |                                                                 | Choline salicylate and benzalkonium chloride gel                       | 1 (0.3)    |
|    | Total                                                           |                                                                        | 2 (0.6)    |
| 33 | Antihistaminics, Para aminophenol derivatives                   | Chlorpheniramine 2 mg + paracetamol 500 mg tab.                        | 2 (0.5)    |
| 34 | Centrally acting muscle relaxants, Para aminophenol derivatives | Chlorzoxazone 250 mg + paracetamol 325 mg tab.                         | 13 (3.3)   |
| 35 | First generation FQs                                            | Ciprofloxacin eye drop                                                 | 2 (0.5)    |
|    |                                                                 | Ciprofloxacin eye oint.                                                | 9 (2.3)    |
|    |                                                                 | Ciprofloxacin tab. 500 mg                                              | 3 (0.8)    |
|    | Total                                                           |                                                                        | 14 (3.6)   |
| 36 | BZDs                                                            | Clonazepam tab. 0.25 mg                                                | 3 (0.8)    |
|    |                                                                 | Clonazepam tab. 0.5 mg                                                 | 1 (0.3)    |
|    | Total                                                           |                                                                        | 4 (1.1)    |
| 37 | Azole derivatives                                               | Clotrimazole oral paint                                                | 1 (0.3)    |
|    |                                                                 | Clotrimazole vaginal gel                                               | 4 (1)      |
|    | Total                                                           |                                                                        | 5 (1.3)    |
| 38 | H1 Antihistaminics                                              | Cyproheptadine syp.                                                    | 2 (0.5)    |
| 39 | Non-opioid antitussives, Antihistaminics                        | Dextromethorphan 15 mg+Chlorpheniramine 1 mg + Phenylephrine 5 mg syp. | 1 (0.3)    |
| 40 | Antraquinones                                                   | Diacerein tab. 50 mg                                                   | 1 (0.3)    |
| 41 | Antisecretory-antispasmodic tertiary amines                     | Dicycloverine syp.                                                     | 3 (0.8)    |
| 42 | Digestants (Methyl polysiloxane)                                | Dimethicone syp.                                                       | 1 (0.3)    |
|    |                                                                 | Heath tonic syp.                                                       | 1 (0.3)    |
|    |                                                                 | Liver tonic                                                            | 1 (0.3)    |
|    | Total                                                           |                                                                        | 3 (0.9)    |
| 43 | D2 receptor antagonists                                         | Domperidone syp.                                                       | 1 (0.3)    |
|    |                                                                 | Domperidone tab. 10 mg                                                 | 13 (3.3)   |
|    | Total                                                           |                                                                        | 14 (3.6)   |
| 44 | Theophylline derivatives                                        | Doxofylline tab. 400 mg                                                | 3 (0.8)    |



|    |                                                          |                                                  |            |
|----|----------------------------------------------------------|--------------------------------------------------|------------|
| 45 | Tetracyclines                                            | Doxycycline cap. 100 mg                          | 2 (0.5)    |
| 46 | ACE inhibitors                                           | Enalapril tab. 2.5 mg                            | 1 (0.3)    |
|    |                                                          | Enalapril tab. 5 mg                              | 1 (0.3)    |
|    |                                                          | Ramipril tab. 5 mg                               | 1 (0.3)    |
|    | Total                                                    |                                                  | 3 (0.9)    |
| 47 | SSRIs                                                    | Escitalopram tab. 10 mg                          | 2 (0.5)    |
| 48 | Proton pump inhibitors                                   | Esomeprazole tab. 20 mg                          | 1 (0.3)    |
|    |                                                          | Esomeprazole tab. 40 mg                          | 29 (7.2)   |
|    |                                                          | Omeprazole cap. 40 mg                            | 1 (0.3)    |
|    |                                                          | Pantoprazole tab. 40 mg                          | 77 (19.3)  |
|    |                                                          | Rabeprazole tab. 20 mg                           | 28 (7)     |
|    |                                                          | Rabeprazole tab. 40 mg                           | 1 (0.3)    |
|    | Total                                                    |                                                  | 137 (34.4) |
| 49 | Methylxanthines                                          | Etophylline and theophylline tab. 150 mg         | 2 (0.5)    |
| 50 | NSAIDs (Selective COX-2 inhibitors)                      | Etoricoxib tab. 60 mg                            | 1 (0.3)    |
|    |                                                          | Etoricoxib tab. 90 mg                            | 1 (0.3)    |
|    | NSAIDs (Preferential COX-2 Inhibitors)                   | Nimesulide tab. 100 mg                           | 15 (3.8)   |
|    | NSAIDs (Propionic acid derivatives)                      | Flurbiprofen eye drop                            | 2 (0.5)    |
|    |                                                          | Naproxen tab. 500 mg                             | 2 (0.5)    |
|    | NSAIDs (Acetic acid derivatives)                         | Indometacin cap. 50 mg                           | 3 (0.8)    |
|    |                                                          | Indometacin tab. 75 mg                           | 1 (0.3)    |
|    | NSAIDs (Fenamates)                                       | Mefenamic acid tab.                              | 3 (0.8)    |
|    | Total                                                    |                                                  | 28 (7.3)   |
| 51 | XOIs                                                     | Febuxostat tab. 40 mg                            | 7 (1.8)    |
| 52 | Lipoprotein lipase activators (Fibrates)                 | Fenofibrate tab. 160 mg                          | 5 (1.3)    |
| 53 | Mineral supplements                                      | Ferrous ascorbate and folic acid tab.            | 1 (0.3)    |
|    |                                                          | Ferrous ascorbate cap.                           | 2 (0.5)    |
|    | Total                                                    |                                                  | 3 (0.8)    |
| 54 | 5 a -reductase inhibitors                                | Finasteride tab. 5 mg                            | 1 (0.3)    |
| 55 | Penicillinase resistant penicillins                      | Flucloxacillin tab. 500 mg                       | 3 (0.8)    |
| 56 | Triazole antifungals                                     | Fluconazole cap. 150 mg                          | 11 (2.8)   |
|    |                                                          | Ketoconazole shampoo                             | 2 (0.5)    |
|    | Total                                                    |                                                  | 13 (3.3)   |
| 57 | Para aminophenol derivatives, Propionic acid derivatives | Paracetamol + ibuprofen syp.                     | 2 (0.5)    |
|    |                                                          | Paracetamol 500 mg and ibuprofen 400 mg tab.     | 15 (3.8)   |
|    | Total                                                    |                                                  | 17 (4.3)   |
| 58 | Para aminophenol derivatives, CNS stimulants             | Paracetamol 500 mg + caffeine 25 mg              | 2 (0.5)    |
| 59 | Para aminophenol derivatives                             | Paracetamol syp.                                 | 19 (4.8)   |
|    |                                                          | Paracetamol tab. 250 mg                          | 1 (0.3)    |
|    |                                                          | Paracetamol tab. 500 mg                          | 9 (2.3)    |
|    | Total                                                    |                                                  | 29 (7.4)   |
| 60 | Para aminophenol derivatives, Opioids                    | Paracetamol 500 mg and codeine 10 mg tab.        | 3 (0.8)    |
| 61 | Bronchodilators, corticosteroids                         | Formoterol 6 mg and budesonide 400 mcg rotacap   | 3 (0.8)    |
|    |                                                          | Salmeterol 50 mcg and fluticasone 250 mg rotacap | 6 (1.5)    |
|    | Total                                                    |                                                  | 9 (2.3)    |
| 62 | Loop diuretics, potassium sparing diuretics              | Furosemide & amiloride tab.                      | 2 (0.5)    |
| 63 | Loop diuretics                                           | Furosemide tab. 40 mg                            | 1 (0.3)    |
| 64 | Cyclic GABA analogues                                    | Gabapentin tab. 100 mg                           | 4 (1)      |
|    |                                                          | Gabapentin tab. 300 mg                           | 4 (1)      |
|    |                                                          | Pregabalin cap. 75 mg                            | 7 (1.8)    |
|    |                                                          | Pregabalin tab. 50 mg                            | 2 (0.5)    |
|    | Total                                                    |                                                  | 17 (4.3)   |
| 65 | Sulfonylureas                                            | Gliclazide tab. 40 mg                            | 1 (0.3)    |
|    |                                                          | Gliclazide tab. 80 mg                            | 1 (0.3)    |
|    |                                                          | Glimepiride tab. 1 mg                            | 2 (0.5)    |
|    |                                                          | Glimepiride tab. 2 mg                            | 9 (2.3)    |
|    |                                                          | Glimepiride tab. 3 mg                            | 5 (1.3)    |
|    |                                                          | Glipizide tab. 5 mg                              | 1 (0.3)    |
|    | Total                                                    |                                                  | 19 (5)     |
| 66 | Amino sugars                                             | Glucosamine tab. 500 mg                          | 2 (0.5)    |
| 67 | Secretion enhancer expectorants                          | Guaifenesin syp.                                 | 1 (0.3)    |
| 68 | Corticosteroids                                          | Halobetasol cream                                | 1 (0.3)    |
|    |                                                          | Prednisolone tab. 30/20/10 mg                    | 1 (0.3)    |

|    |                                       |                                                                                    |          |
|----|---------------------------------------|------------------------------------------------------------------------------------|----------|
|    | Total                                 |                                                                                    | 2 (0.6)  |
| 69 | Thiazides                             | Hydrochlorothiazide tab. 12.5 mg                                                   | 2 (0.5)  |
|    |                                       | Hydrochlorothiazide tab. 25 mg                                                     | 1 (0.3)  |
|    | Total                                 |                                                                                    | 3 (0.8)  |
| 70 | Semisynthetic anticholinergics        | Hyoscine tab. 10 mg                                                                | 6 (1.5)  |
|    |                                       | Hyoscine tab. 20 mg                                                                | 1 (0.3)  |
|    |                                       | Tiotropium rotacap 18 mcg                                                          | 7 (1.8)  |
|    | Total                                 |                                                                                    | 14 (3.6) |
| 71 | Antidiabetic peptide hormones         | Insulin inj.                                                                       | 2 (0.5)  |
| 72 | Osmotic purgatives                    | Lactulose syp.                                                                     | 2 (0.5)  |
| 73 | Bulk forming laxatives                | Isapgol (Psyllium) Husk                                                            | 1 (0.3)  |
| 74 | Long-acting nitrates                  | Isosorbide dinitrate tab. 5 mg                                                     | 1 (0.3)  |
|    |                                       | Isosorbide mononitrate tab. 10 mg                                                  | 1 (0.3)  |
|    | Total                                 |                                                                                    | 2 (0.6)  |
| 75 | Second generation FQs                 | Levofloxacin tab. 500 mg                                                           | 1 (0.3)  |
| 76 | Intermediate potency and duration LAs | Lidocaine (2% w/w) + Chlorhexidine Gluconate (1% w/w) + Metronidazole (1% w/w) gel | 2 (0.5)  |
|    |                                       | Lidocaine, Hydrocortisone acetate, Zinc Oxide and Allantoin oint.                  | 1 (0.3)  |
|    | Total                                 |                                                                                    | 3 (0.8)  |
| 77 | DPP-4 inhibitors                      | Linagliptin tab. 5 mg                                                              | 1 (0.3)  |
|    |                                       | Sitagliptin tab. 50 mg                                                             | 1 (0.3)  |
|    | Total                                 |                                                                                    | 2 (0.6)  |
| 78 | DPP-4 inhibitors, Biguanides          | Sitagliptin 50 mg + metformin 850 mg tab.                                          | 2 (0.5)  |
|    |                                       | Sitagliptin 50 mg + Metformin 500 mg tab.                                          | 1 (0.3)  |
|    |                                       | Sitagliptin 50 mg and metformin 1 g tab.                                           | 9 (2.3)  |
|    | Total                                 |                                                                                    | 12 (3.1) |
| 79 | Stool softeners                       | Liquid paraffin syp.                                                               | 1 (0.3)  |
| 80 | Antidiarrheal opiate analogues        | Loperamide tab. 2 mg                                                               | 2 (0.5)  |
| 81 | ARBs, thiazides                       | Losartan 50 mg + hydrochlorothiazide 12.5 mg tab.                                  | 10 (2.5) |
|    |                                       | Telmisartan 40 mg and hydrochlorothiazide 12.5 mg                                  | 1 (0.3)  |
|    | Total                                 |                                                                                    | 11 (2.8) |
| 82 | ARBs                                  | Losartan tab. 25 mg                                                                | 5 (1.3)  |
|    |                                       | Losartan tab. 50 mg                                                                | 10 (2.5) |
|    |                                       | Telmisartan tab. 20 mg                                                             | 2 (0.5)  |
|    |                                       | Telmisartan tab. 40 mg                                                             | 5 (1.3)  |
|    |                                       | Telmisartan tab. 80 mg                                                             | 2 (0.5)  |
|    | Total                                 |                                                                                    | 24 (6.1) |
| 83 | Antiseptics                           | Medicated toothpaste                                                               | 2 (0.5)  |
|    |                                       | Povidone iodine gargle                                                             | 6 (1.5)  |
|    |                                       | Povidone iodine solution                                                           | 1 (0.3)  |
|    | Total                                 |                                                                                    | 9 (2.3)  |
| 84 | Progesterone derivatives              | Medroxyprogesterone tab. 10 mg                                                     | 2 (0.5)  |
| 85 | Biguanides, sulfonylureas             | Metformin 1 g + glimepiride 2 mg tab.                                              | 3 (0.8)  |
|    |                                       | Metformin 1 g and glimepiride 1 mg tab.                                            | 8 (2)    |
|    | Total                                 |                                                                                    | 11 (2.8) |
| 86 | Biguanides                            | Metformin tab. 1 g                                                                 | 6 (1.5)  |
|    |                                       | Metformin tab. 850 mg                                                              | 14 (3.5) |
|    |                                       | Metformin tab. 500 mg                                                              | 10 (2.5) |
|    | Total                                 |                                                                                    | 30 (7.5) |
| 87 | Biguanides, DPP-4 inhibitors          | Metformin tab. 1 g + sitagliptin 100 mg                                            | 1 (0.3)  |
| 88 | Biguanides, sulfonylureas             | Metformin tab. 500 mg with glimepiride tab. 2 mg                                   | 2 (0.5)  |
|    |                                       | Metformin tab. 500 mg with glimepiride 1 mg                                        | 4 (1)    |
|    |                                       | Metformin tab. 850 mg and glimepiride 1 g                                          | 1 (0.3)  |
|    | Total                                 |                                                                                    | 7 (1.8)  |
| 89 | DHFR inhibitors                       | Methotrexate tab.                                                                  | 1 (0.3)  |
| 90 | Nitroimidazoles                       | Metronidazole syp.                                                                 | 2 (0.5)  |
|    |                                       | Metronidazole tab. 200 mg                                                          | 1 (0.3)  |
|    |                                       | Metronidazole tab. 400 mg                                                          | 15 (3.8) |
|    |                                       | Metronidazole, clotrimazole and lactic acid vaginal tab.                           | 2 (0.5)  |
|    |                                       | Tinidazole tab. 1 g                                                                | 3 (0.8)  |
|    |                                       | Tinidazole tab. 2 g                                                                | 4 (1)    |
|    |                                       | Secnidazole tab. 2 g                                                               | 3 (0.8)  |
|    |                                       | Ornidazole tab. 500 mg                                                             | 4 (1)    |
|    | Total                                 |                                                                                    | 34 (8.7) |
| 91 | Leukotriene antagonists               | Montelukast tab. 10 mg                                                             | 1 (0.3)  |
| 92 | Antibacterials                        | Mupirocin oint. 2%                                                                 | 6 (1.5)  |
| 93 | Aminoglycosides                       | Neomycin eye drop                                                                  | 1 (0.3)  |

|     |                                                 |                                            |          |
|-----|-------------------------------------------------|--------------------------------------------|----------|
| 94  | Sex hormone preparations                        | Norgestrel and ethinyloestradiol tab.      | 2 (0.5)  |
| 95  | Selective 5-HT <sub>3</sub> blockers            | Ondansetron tab. 4 mg                      | 1 (0.3)  |
| 96  | Electrolytes                                    | Oral Rehydration Solution (ORS)            | 3 (0.8)  |
|     |                                                 | Potassium citrate syp.                     | 1 (0.3)  |
|     | Total                                           |                                            | 4 (1.1)  |
| 97  | Nasal decongestants                             | Oxymetazoline nasal drop                   | 1 (0.3)  |
| 98  | Potent pyrethroid insecticides                  | Permethrin lotion                          | 1 (0.3)  |
| 99  | Barbiturates                                    | Phenobarbital tab. 60 mg                   | 1 (0.3)  |
| 100 | Alpha blockers                                  | Prazosin tab. 2.5 mg                       | 1 (0.3)  |
|     |                                                 | Tamsulosin cap. 0.4 mg                     | 4 (1)    |
|     | Total                                           |                                            | 5 (1.3)  |
| 101 | Neuroleptics (D <sub>2</sub> blockers)          | Prochlorperazine tab. 5 mg                 | 1 (0.3)  |
| 102 | H <sub>2</sub> Antihistamines                   | Ranitidine tab. 150 mg                     | 5 (1.3)  |
| 103 | Antihistaminics                                 | Rupatadine tab. 10 mg                      | 1 (0.3)  |
| 104 | Bronchodilators                                 | Salbutamol rotacap 200 mcg                 | 2 (0.5)  |
|     |                                                 | Salbutamol syp. 2 mg                       | 1 (0.3)  |
|     | Total                                           |                                            | 3 (0.8)  |
| 105 | Keratolytics                                    | Salicylic acid 20% oint.                   | 1 (0.3)  |
| 106 | Mast cell stabilizers                           | Sodium cromoglicate eye drop 2%            | 1 (0.3)  |
| 107 | Thyroid hormone preparations                    | Thyroxine tab. 100 mg                      | 1 (0.3)  |
|     |                                                 | Thyroxine tab. 25 mcg                      | 5 (1.3)  |
|     |                                                 | Thyroxine tab. 37.5 mg                     | 1 (0.3)  |
|     |                                                 | Thyroxine tab. 50 mcg                      | 7 (1.8)  |
|     |                                                 | Thyroxine tab. 75 mg                       | 3 (0.8)  |
|     | Total                                           |                                            | 17 (4.5) |
| 108 | Central α <sub>2</sub> agonists                 | Tizanidine tab. 2 mg                       | 3 (0.8)  |
| 109 | Synthetic opioids, Para aminophenol derivatives | Tramadol 37.5 mg and paracetamol 325 mg OD | 1 (0.3)  |
| 110 | Antifibrinolytics                               | Tranexamic acid tab. 500 mg                | 2 (0.5)  |
| 111 | Antiviral drugs                                 | Valacyclovir tab. 1 g                      | 1 (0.3)  |
| 113 | Coumarin anticoagulants                         | Warfarin tab. 1 mg                         | 1 (0.3)  |
|     |                                                 | Warfarin tab. 5 mg                         | 1 (0.3)  |
|     | Total                                           |                                            | 2 (0.3)  |
